# Supplementary material for: The progression of strong and weak hydrogen bonds in a series of ethylenediammonium dithiocyanate derivatives—a new bonding protocol for macromolecules?
Source: Royal Society of Chemistry journal article supplement (doi:10.1039/b800108a), 2008-01-01
Supplement: b800108a.pdf [file b800108a.pdf]

**Supporting Information**

**for the paper**

**“The Progression of Strong and Weak  
Hydrogen Bonds in a Series of  
Ethylenediammonium Dithiocyanate  
Derivatives”**

**David J. Wolstenholme\*<sup>†</sup>, Jan J. Weigand<sup>‡</sup>, Elinor Cameron<sup>†</sup>, T. Stanley Cameron<sup>†</sup>**

*Department of Chemistry, Dalhousie University, Halifax, Nova Scotia, Canada, B3H 4J3,  
and Westfälische Wilhelms-Universität Münster, Institut für Anorganische und  
Analytische Chemie, Corrensstrasse 30/36, D-48149 Münster, Germany*

\* To whom the correspondence should be addressed. D. W.: phone, +1-(902)-494-3759,  
e-mail, [dwolsten@dal.ca](mailto:dwolsten@dal.ca).

<sup>†</sup> Dalhousie University

<sup>‡</sup> Westfälische Wilhelms-Universität Münster

**Residual Maps:**

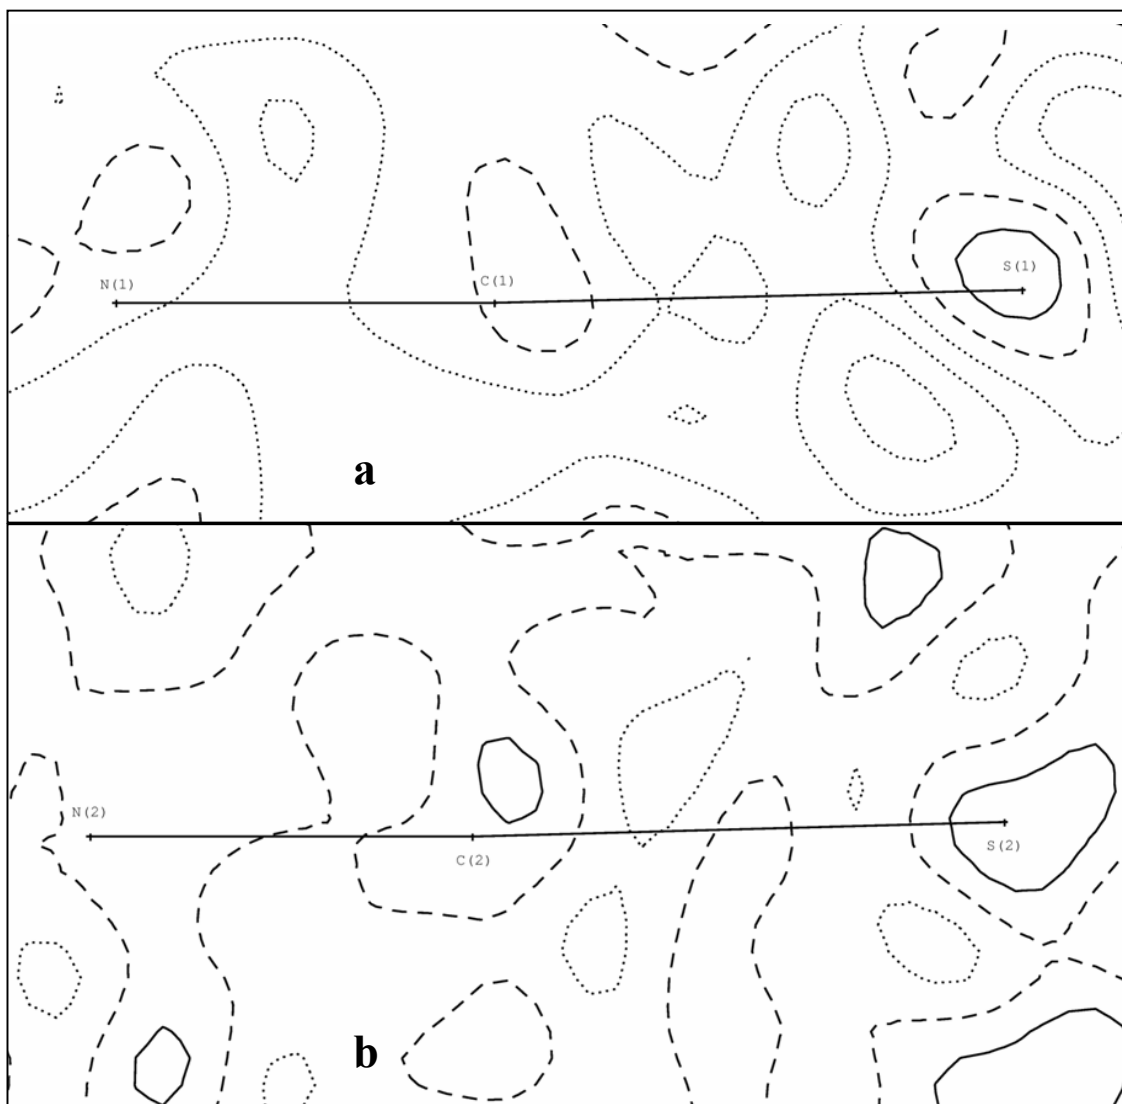

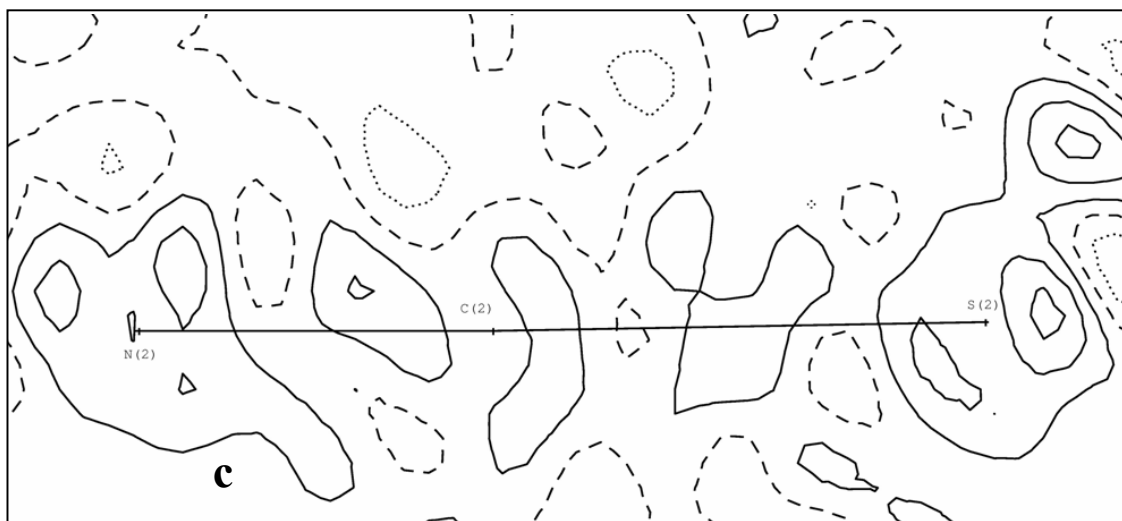

**Fig. S1** Residual density maps with positive contours as solid lines, negative contour as dotted lines, and the zero contour line as dashes. a) the N1-C1-S1 plane of the thiocyanate in (I), b) the N2-C2-S2 plane of a thiocyanate in (III), and c) the N2-C2-S2 plane of a thiocyanate in (IV). All contour intervals are taken in increments of  $0.1 \text{ e}\text{\AA}^{-3}$ .

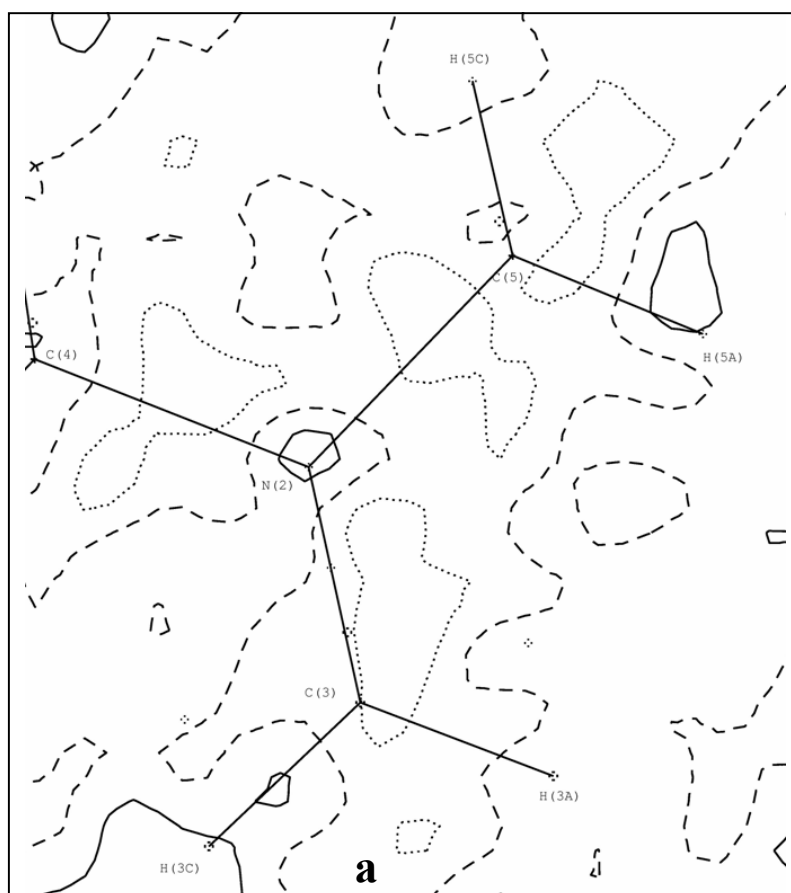

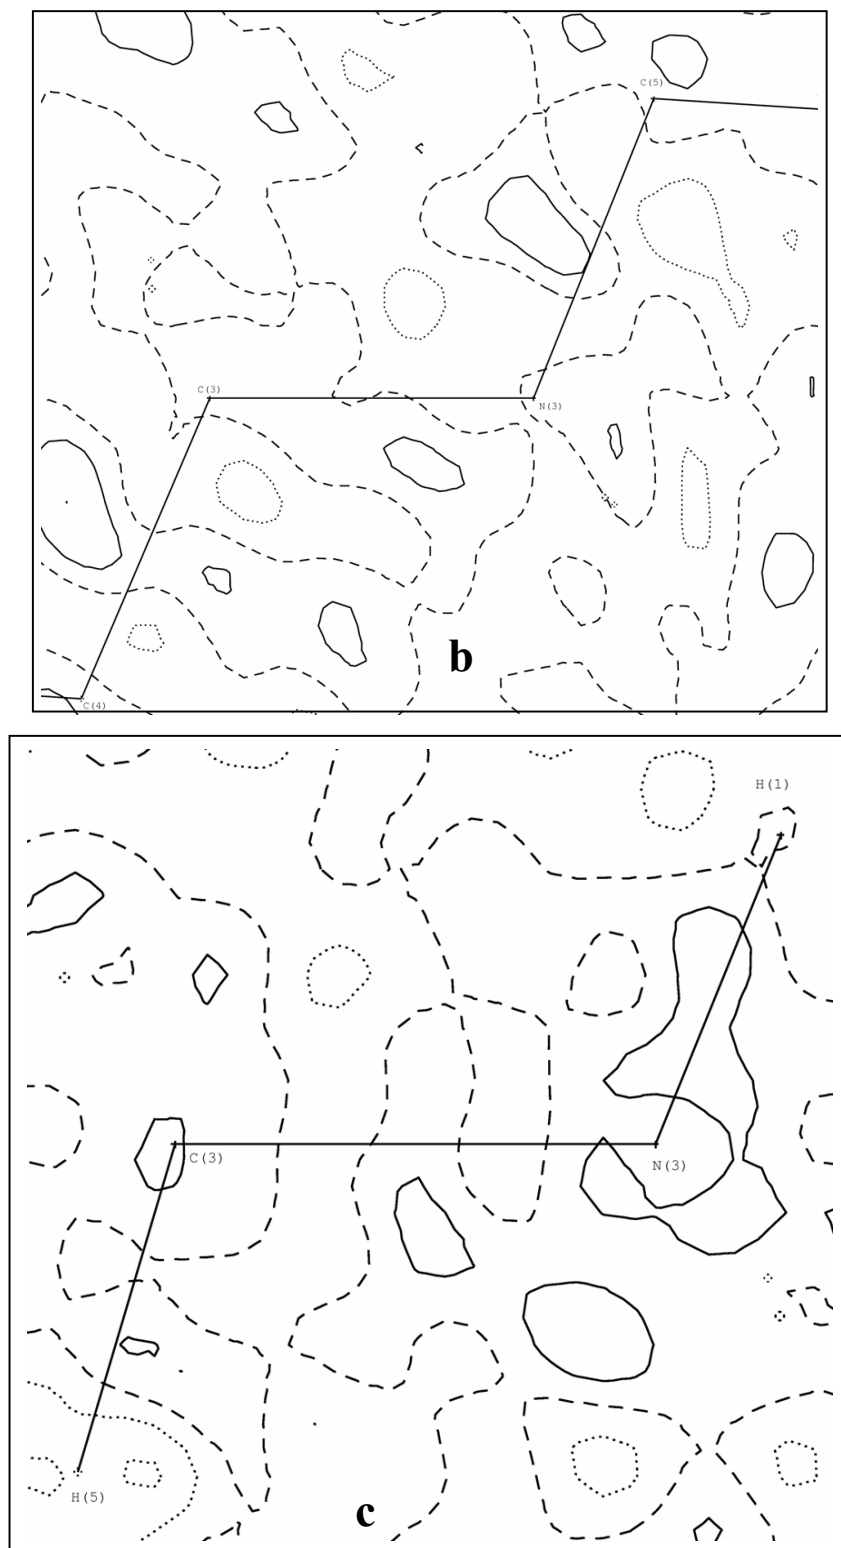

**Fig. S2** Residual density maps with positive contours as solid lines, negative contour as dotted lines, and the zero contour line as dashes. a) the C4-N4-C5 plane of the dication in (I), b) the C3-N3-C5 plane of a dication in (III), and c) the C3-N3-H1 plane of a dication in (IV). All contour intervals are taken in increments of  $0.1 \text{ e}\text{\AA}^{-3}$ .

**N-H...N and C-H...N Geometries:**

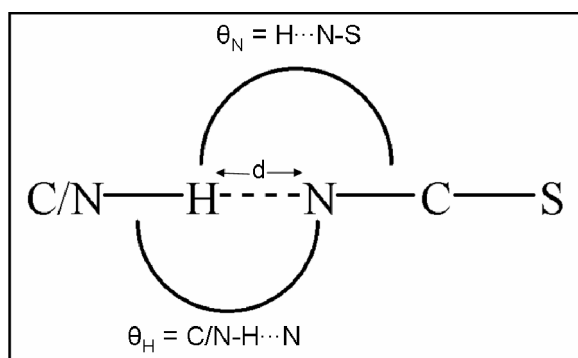

| Interaction                        | Internuclear Distance, d (Å) | $\theta_N$ (°) | $\theta_H$ (°) | Interaction                        | Internuclear Distance, d (Å) | $\theta_N$ (°) | $\theta_H$ (°) |
|------------------------------------|------------------------------|----------------|----------------|------------------------------------|------------------------------|----------------|----------------|
| <b>Compound I</b>                  |                              |                |                |                                    |                              |                |                |
| N1...H2b-C2<br>3/2-X,1/2+Y,1/2-Z   | 2.9272(7)                    | 91.18(2)       | 105.19(3)      | N1...H3b-C3<br>1-X,1-Y,1-Z         | 2.4482(7)                    | 141.50(3)      | 152.72(3)      |
| N1...H4a-C4<br>1-X,1-Y,1-Z         | 2.4709(7)                    | 134.57(3)      | 153.80(3)      | N1...H4b-C4<br>-1/2+X,3/2-Y,-1/2+Z | 2.5351(7)                    | 133.40(3)      | 156.48(3)      |
| N1...H5c-C5<br>-1/2+X,3/2-Y,-1/2+Z | 2.5922(7)                    | 132.73(3)      | 151.12(3)      |                                    |                              |                |                |
| <b>Compound II<sup>†</sup></b>     |                              |                |                |                                    |                              |                |                |
| N1...H2-N2<br>-1+X,+Y,+Z           | 1.7602(3)                    | 167.45(1)      | 163.71(1)      | N1...H2b-C2<br>3-X,-Y,1-Z          | 2.8116(3)                    | 133.40(1)      | 116.17(1)      |
| <b>Compound III</b>                |                              |                |                |                                    |                              |                |                |
| N1...H1-N3<br>-X,-Y,1-Z            | 1.8876(7)                    | 131.18(4)      | 153.16(4)      | N1...H3-N4<br>-X,-Y,1-Z            | 1.8597(7)                    | 147.47(4)      | 159.58(3)      |
| N2...H4-N4<br>1+X,+Y,+Z            | 1.7655(8)                    | 163.18(5)      | 169.61(4)      | N2...H6a-C6<br>1-X,1-Y,1-Z         | 2.8913(9)                    | 85.42(3)       | 157.98(5)      |
| <b>Compound VI</b>                 |                              |                |                |                                    |                              |                |                |
| N1...H1-N3<br>1+X,1/2-Y,-1/2+Z     | 1.9382(5)                    | 122.61(2)      | 163.45(3)      | N1...H4-N4<br>+X,+Y,+Z             | 1.8672(5)                    | 122.13(2)      | 168.86(3)      |
| N2...H2-N3<br>+X,1+Y,+Z            | 1.8660(6)                    | 118.60(3)      | 167.31(3)      | N2...H6-N4<br>+X,3/2-Y,1/2+Z       | 1.8955(6)                    | 123.69(3)      | 158.46(3)      |
| N1...H3b-C3<br>1-X,1/2+Y,1/2-Z     | 2.7435(6)                    | 133.74(2)      | 129.20(3)      | N2...H3a-C3<br>-X,1-Y,1-Z          | 2.7165(6)                    | 119.40(2)      | 132.08(3)      |
| N2...H4a-C4<br>1+X,-1/2-Y,1/2+Z    | 2.9316(6)                    | 99.27(2)       | 127.56(2)      |                                    |                              |                |                |

† Previously Published<sup>11</sup>

**N-H...S and C-H...S Geometries:**

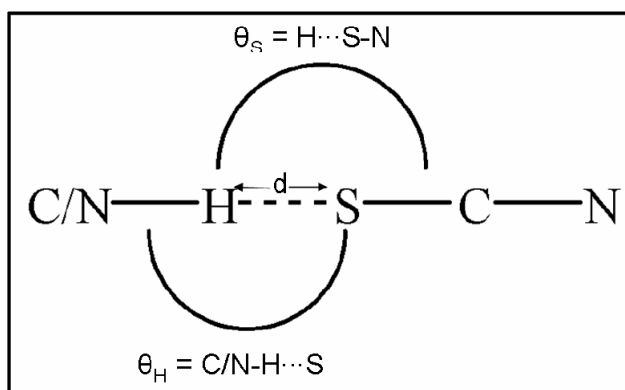

| Interaction                     | Internuclear Distance, d (Å) | $\theta_N$ (°) | $\theta_H$ (°) | Interaction                        | Internuclear Distance, d (Å) | $\theta_N$ (°) | $\theta_H$ (°) |
|---------------------------------|------------------------------|----------------|----------------|------------------------------------|------------------------------|----------------|----------------|
| <b>Compound I</b>               |                              |                |                |                                    |                              |                |                |
| S1...H2a-C2<br>+X,+Y,+Z         | 2.6920(6)                    | 106.41(2)      | 168.59(3)      | S1...H2b-C2<br>-1/2+X,1/2-Y,-1/2+Z | 2.7698(5)                    | 95.91(2)       | 157.22(3)      |
| S1...H3a-C3<br>+X,+Y,+Z         | 3.0936(6)                    | 91.22(2)       | 143.44(1)      | S1...H4c-C4<br>-1/2+X,1/2-Y,-1/2+Z | 2.8047(6)                    | 80.64(2)       | 161.90(3)      |
| <b>Compound II<sup>†</sup></b>  |                              |                |                |                                    |                              |                |                |
| S1...H2b-C2<br>+X,1+Y,+Z        | 3.0597(1)                    | 127.36(1)      | 137.75(1)      | S1...H3b-C3<br>2-X,-Y,-Z           | 2.8400(1)                    | 125.75(1)      | 172.62(1)      |
| S1...H3c-C3<br>+X,1+Y,+Z        | 2.7958(1)                    | 136.01(1)      | 153.05(1)      | S1...H4b-C4<br>+X,1+Y,+Z           | 2.9508(1)                    | 168.81(1)      | 145.57(2)      |
| <b>Compound III</b>             |                              |                |                |                                    |                              |                |                |
| S1...H2-N3<br>1-X,-Y,1-Z        | 2.2107(6)                    | 98.07(3)       | 170.80(3)      | S2...H3a-C3<br>1+X,+Y,1+Z          | 3.0421(7)                    | 104.51(3)      | 139.41(3)      |
| S2...H3b-C3<br>+X,+Y,1+Z        | 2.8841(6)                    | 134.83(3)      | 169.25(3)      | S2...H5a-C5<br>1-X,-Y,1-Z          | 2.9052(7)                    | 72.53(3)       | 170.67(3)      |
| S2...H6b-C6<br>1+X,+Y,1+Z       | 3.0793(6)                    | 145.57(3)      | 160.16(5)      |                                    |                              |                |                |
| <b>Compound VI</b>              |                              |                |                |                                    |                              |                |                |
| N1...H1-N3<br>1+X,1/2-Y,-1/2+Z  | 1.9382(5)                    | 122.61(2)      | 163.45(3)      | N1...H4-N4<br>+X,+Y,+Z             | 1.8672(5)                    | 122.13(2)      | 168.86(3)      |
| N2...H2-N3<br>+X,1+Y,+Z         | 1.8660(6)                    | 118.60(3)      | 167.31(3)      | N2...H6-N4<br>+X,3/2-Y,1/2+Z       | 1.8955(6)                    | 123.69(3)      | 158.46(3)      |
| N1...H3b-C3<br>1-X,1/2+Y,1/2-Z  | 2.7435(6)                    | 133.74(2)      | 129.20(3)      | N2...H3a-C3<br>-X,1-Y,1-Z          | 2.7165(6)                    | 119.40(2)      | 132.08(3)      |
| N2...H4a-C4<br>1+X,-1/2-Y,1/2+Z | 2.9316(6)                    | 99.27(2)       | 127.56(2)      |                                    |                              |                |                |

<sup>†</sup> Previously Published<sup>11</sup>

**C-H...C<sub>π</sub> Geometries:**

| Interaction                    | Internuclear Distance, d (Å) | θ <sub>N</sub> (°) | θ <sub>H</sub> (°) | Interaction                | Internuclear Distance, d (Å) | θ <sub>N</sub> (°) | θ <sub>H</sub> (°) |
|--------------------------------|------------------------------|--------------------|--------------------|----------------------------|------------------------------|--------------------|--------------------|
| <b>Compound I</b>              |                              |                    |                    |                            |                              |                    |                    |
| C1...H5a-C5<br>+X,+Y,+Z        | 2.6466(5)                    | 91.46(5)           | 175.22(3)          |                            |                              |                    |                    |
| <b>Compound II<sup>†</sup></b> |                              |                    |                    |                            |                              |                    |                    |
| C1...H4c-C4<br>2-X,-Y,1-Z      | 2.7957(2)                    | 99.77(1)           | 140.91(2)          |                            |                              |                    |                    |
| <b>Compound III</b>            |                              |                    |                    |                            |                              |                    |                    |
| C1...H4b-C4<br>1-X,-Y,1-Z      | 2.5327(6)                    | 96.44(3)           | 147.33(3)          | C2...H4a-C4<br>1-X,1-Y,1-Z | 2.6522(6)                    | 90.11(4)           | 149.54(3)          |
| C2...H5b-C5<br>1+X,+Y,1+Z      | 2.5648(6)                    | 98.22(6)           | 167.86(4)          |                            |                              |                    |                    |
| <b>Compound VI</b>             |                              |                    |                    |                            |                              |                    |                    |
| C1...H4b-C4<br>1-X,1-Y,-Z      | 2.7714(4)                    | 92.86(4)           | 142.23(2)          |                            |                              |                    |                    |

† Previously Published<sup>11</sup>

**Static Deformation Maps:**

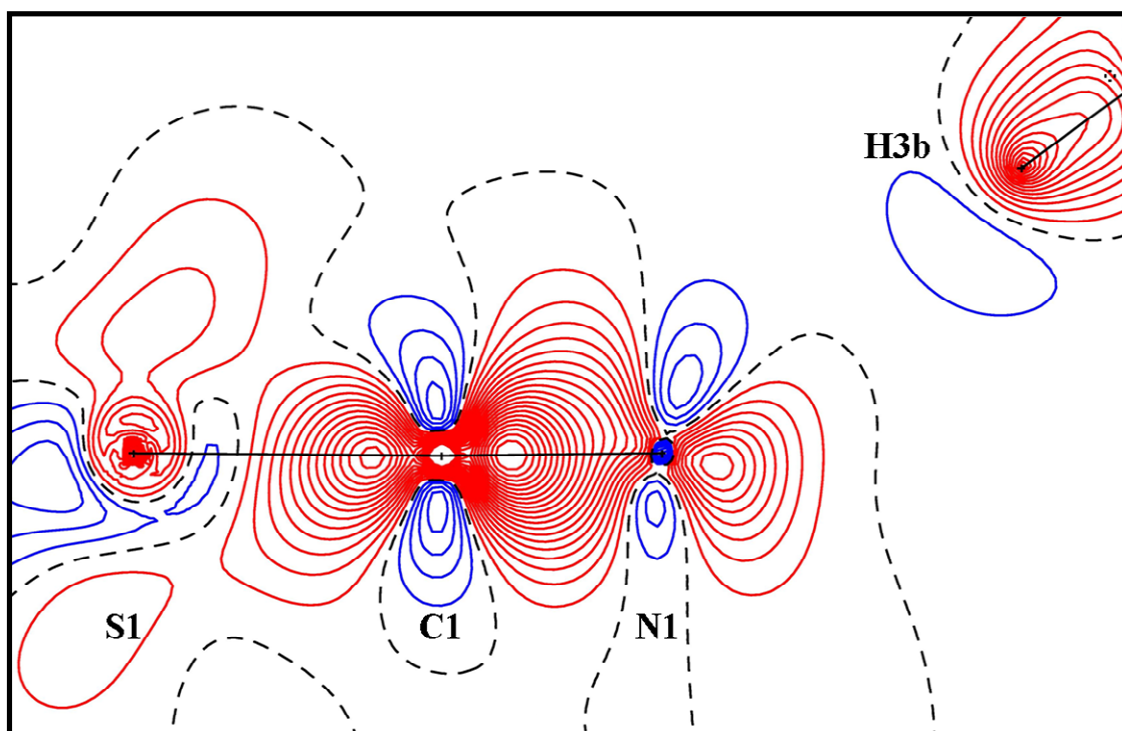

**Fig. S3** The static deformation maps of a C-H...N interaction in (I). The positive (solid red lines) and negative (solid blue lines) contours are in increments of 0.05 eÅ<sup>-3</sup>. The dashed line represents the zero contour line, separating the positive and negative electron density.

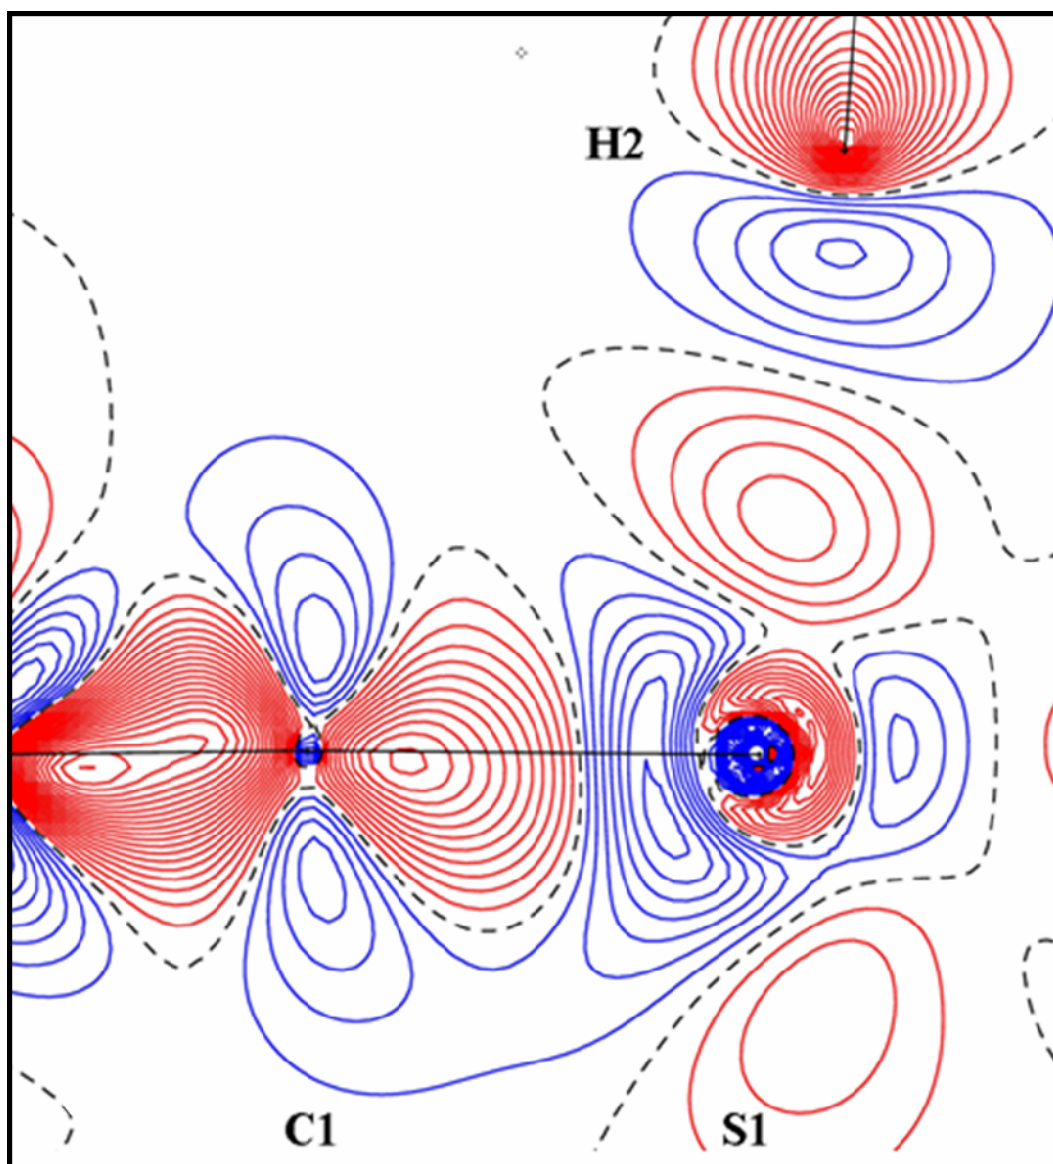

**Fig. S4** The static deformation maps of the N-H...S interaction in (III). The positive (solid red lines) and negative (solid blue lines) contours are in increments of 0.05 eÅ<sup>-3</sup>. The dashed line represents the zero contour line, separating the positive and negative electron



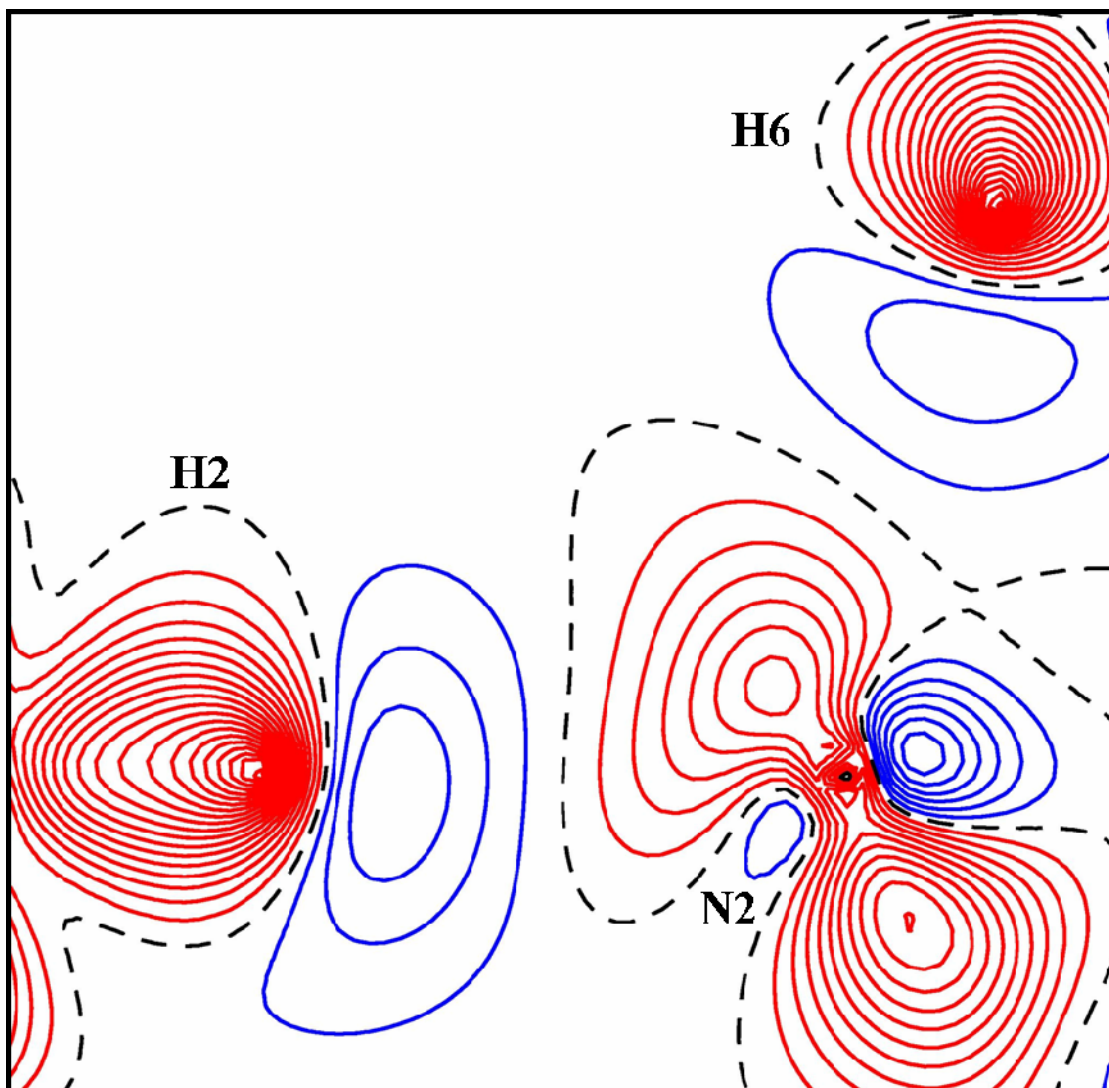

**Fig. S5** The static deformation maps for a bifurcated N-H...N interaction in (IV). The positive (solid red lines) and negative (solid blue lines) contours are in increments of  $0.05 \text{ e}\text{\AA}^{-3}$ . The dashed line represents the zero contour line, separating the positive and negative electron density.

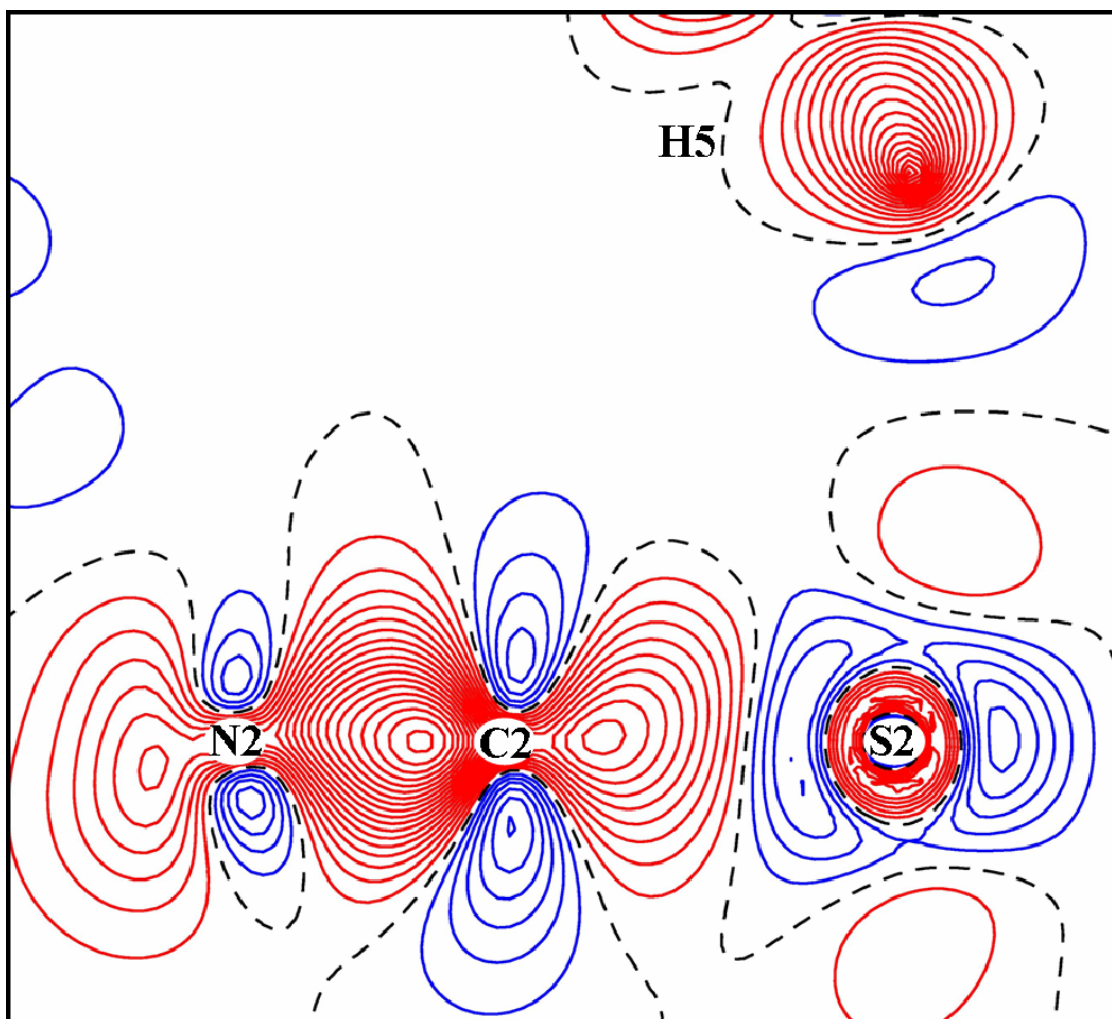

**Fig. S6** The static deformation maps for an N-H...S interaction in (IV). The positive (solid red lines) and negative (solid blue lines) contours are in increments of  $0.05 \text{ e}\text{\AA}^{-3}$ . The dashed line represents the zero contour line, separating the positive and negative electron
